# Supplementary material for: Multilineage differentiation potential of hematoendothelial progenitors derived from human induced pluripotent stem cells
Source: PubMed Central journal article supplement (PMC7659123; doi:10.1186/s13287-020-01997-w), 2020-11-11

**Figure S5**

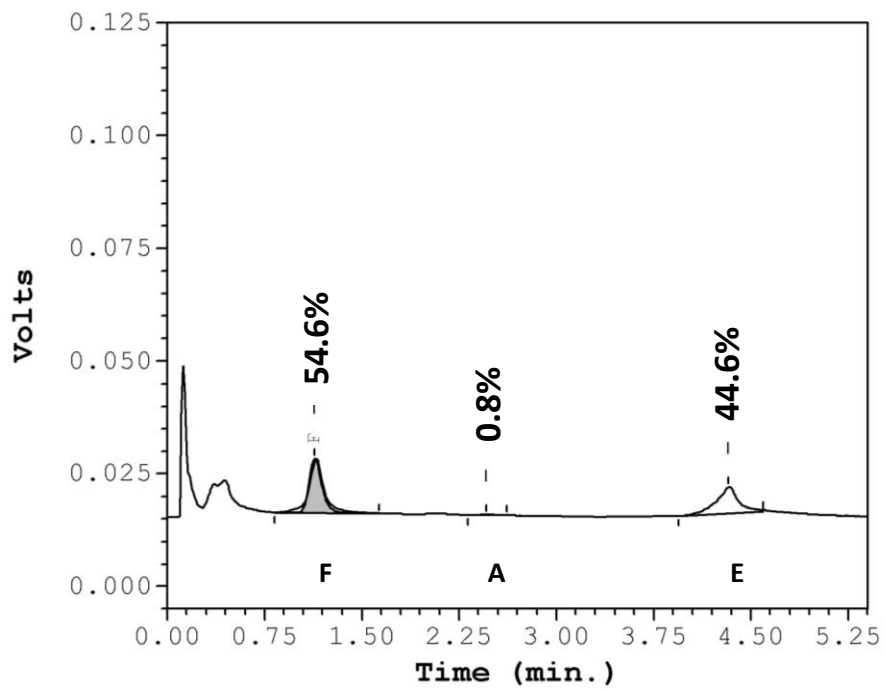

Supplement: 13287_2020_1997_MOESM8_ESM.pdf [file 13287_2020_1997_MOESM8_ESM.pdf]
